# Supplementary material for: MgO Catalysts for FAME Synthesis Prepared Using PEG Surfactant during Precipitation and Calcination
Source: MDPI journal article supplement (doi:10.3390/catal12020226), 2022-02-16

Supplementary Materials:

Table S1. Reaction products by using different catalysts

| Characteristics of catalyst |                             | Characteristics of reaction products, wt.% |     |      |      |      |       |
|-----------------------------|-----------------------------|--------------------------------------------|-----|------|------|------|-------|
| Catalyst                    | Calcination temperature, °C | G                                          | MG  | DG   | TG   | FAME | Sum   |
| PEG1                        | 375                         | 0.2                                        | 6.5 | 13.1 | 52.7 | 22.5 | 95    |
| PEG1                        | 400                         | 0.8                                        | 6.2 | 5.5  | 12   | 73.9 | 98.4  |
| PEG1                        | 450                         | 0.1                                        | 5.3 | 14.1 | 63.2 | 16.6 | 99.3  |
| PEG1                        | 550                         | 0                                          | 0.2 | 4.7  | 90.4 | 2.1  | 97.4  |
|                             |                             |                                            |     |      |      |      |       |
| PEG2                        | 400                         | 0.1                                        | 4.6 | 13.5 | 58   | 22.5 | 98.7  |
| PEG2                        | 450                         | 0.1                                        | 6.1 | 5.5  | 10.9 | 73.5 | 96.2  |
| PEG2                        | 500                         | 0.1                                        | 5.1 | 4.2  | 9.5  | 80.2 | 99.12 |
| PEG2                        | 550                         | 0.2                                        | 7.9 | 8.4  | 20.9 | 61.3 | 98.7  |
|                             |                             |                                            |     |      |      |      |       |
| PEG3                        | 400                         | 0.1                                        | 4.6 | 13.5 | 58   | 20.6 | 96.9  |
| PEG3                        | 450                         | 0.2                                        | 7.7 | 14.2 | 42.4 | 35.4 |       |
| PEG3                        | 500                         | 1.2                                        | 9.1 | 10.6 | 22.9 | 50.8 | 94.5  |
| PEG3                        | 550                         | 0.2                                        | 7.7 | 14.2 | 47.2 | 30.5 | 99.8  |
| PEG3                        | 600                         | 0.2                                        | 0.2 | 4.7  | 83.6 | 10.1 | 98.8  |
|                             |                             |                                            |     |      |      |      |       |
| PEG4                        | 400                         | 0                                          | 0.1 | 2.3  | 95.7 | 0.5  | 98.6  |
| PEG4                        | 450                         | 0.1                                        | 2.8 | 11.8 | 70.1 | 12.6 | 97.4  |
| PEG4                        | 500                         | 0.2                                        | 3.7 | 13.2 | 53.9 | 21.2 | 92.3  |
| PEG4                        | 550                         | 0.2                                        | 3.5 | 13.1 | 52.2 | 30.5 | 99.5  |
| PEG4                        | 600                         | 0.2                                        | 3.1 | 13.1 | 55.1 | 28.2 | 99.7  |
| PEG4                        | 650                         | 0.1                                        | 4.3 | 13.5 | 59.7 | 20.1 | 97.7  |

Reaction conditions: catalyst 7 wt.% of oil, methanol/oil molar ratio 27/1, temperature 65 oC, time 6h.

Figure S1. XRD analysis of PEG1 catalyst Calcined at 400 °C.

Kampars-K5 (Coupled TwoTheta/Theta)

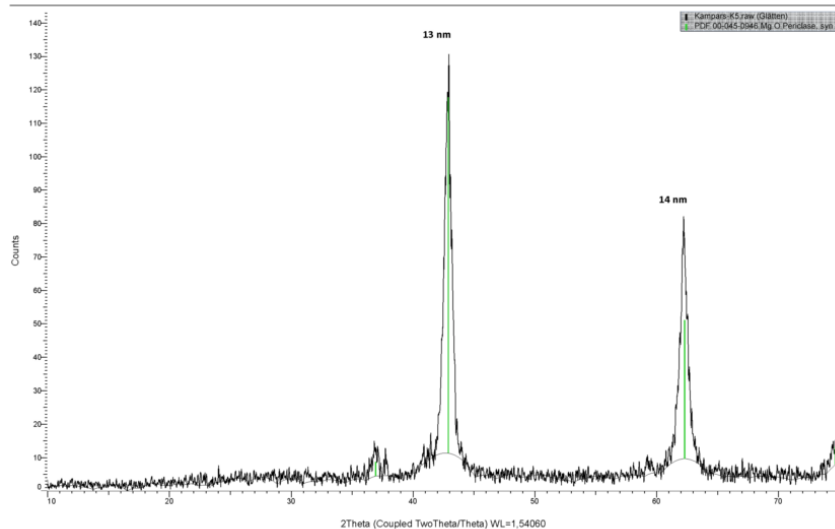

Figure S2. XRD analysis of PEG2 catalyst Calcined at 400 °C.

Kampars-RK-K18 (Coupled TwoTheta/Theta)

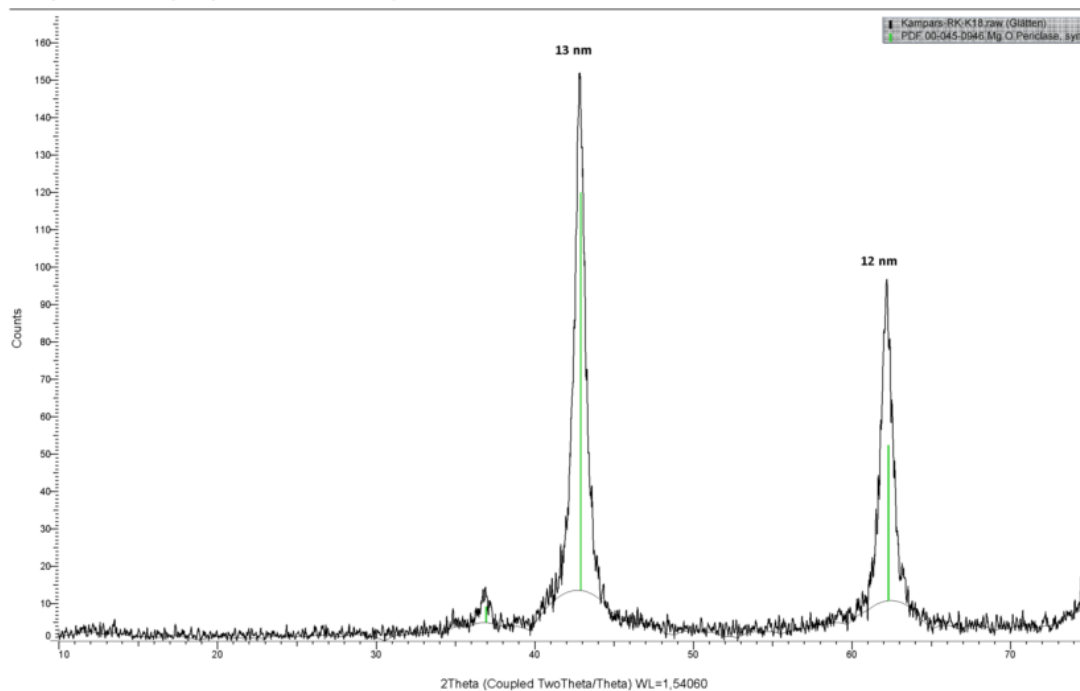

Supplement: s1 [file s1]
